# Supplementary material
Source: PubMed Central journal article supplement (PMC4133139)
Supplement: NIHMS576572-supplement-supplemental_materials.pdf [file NIHMS576572-supplement-supplemental_materials.pdf]

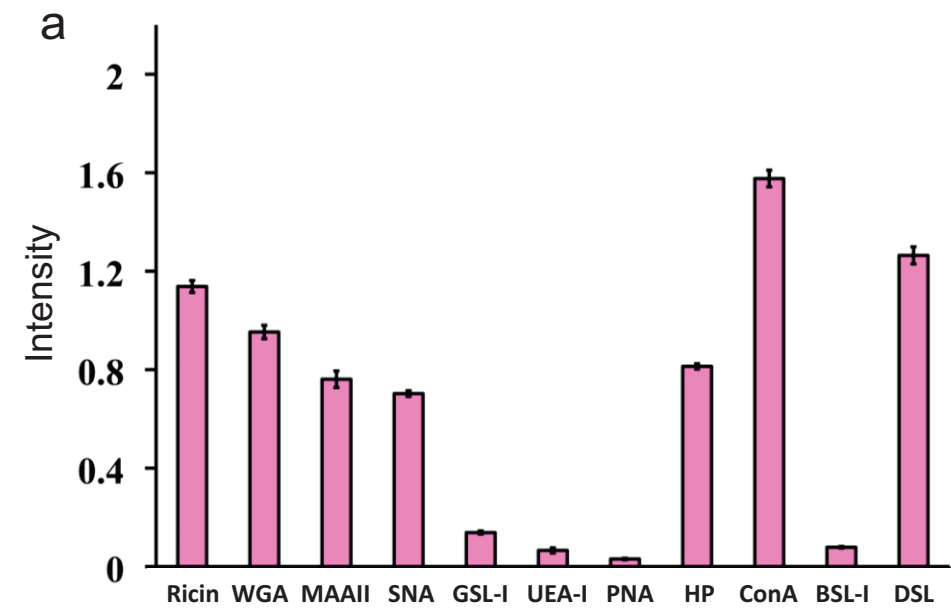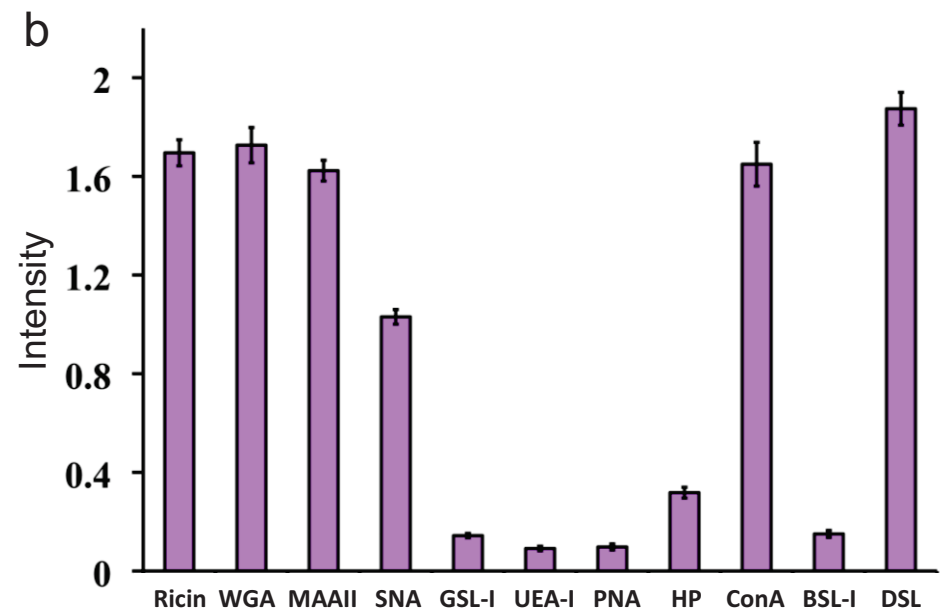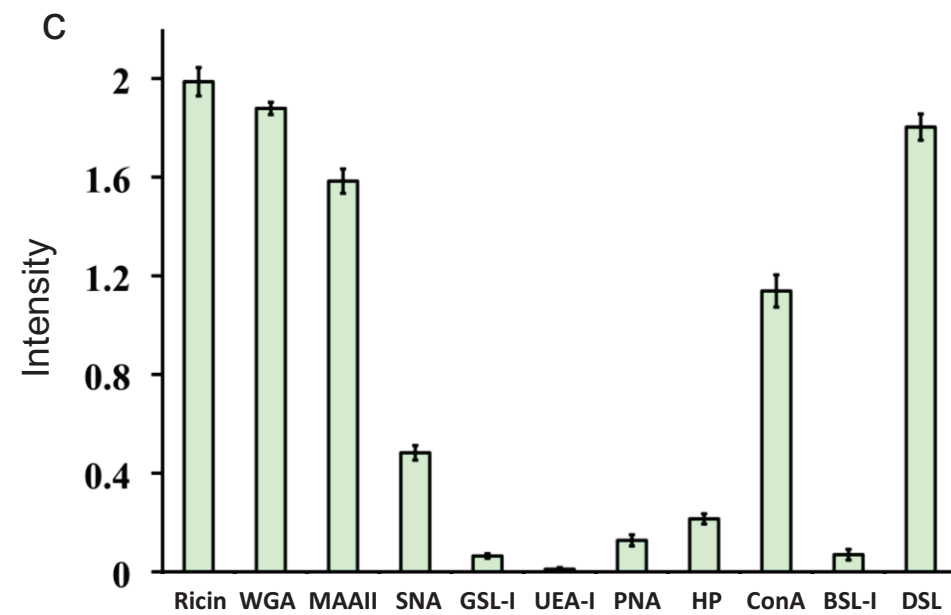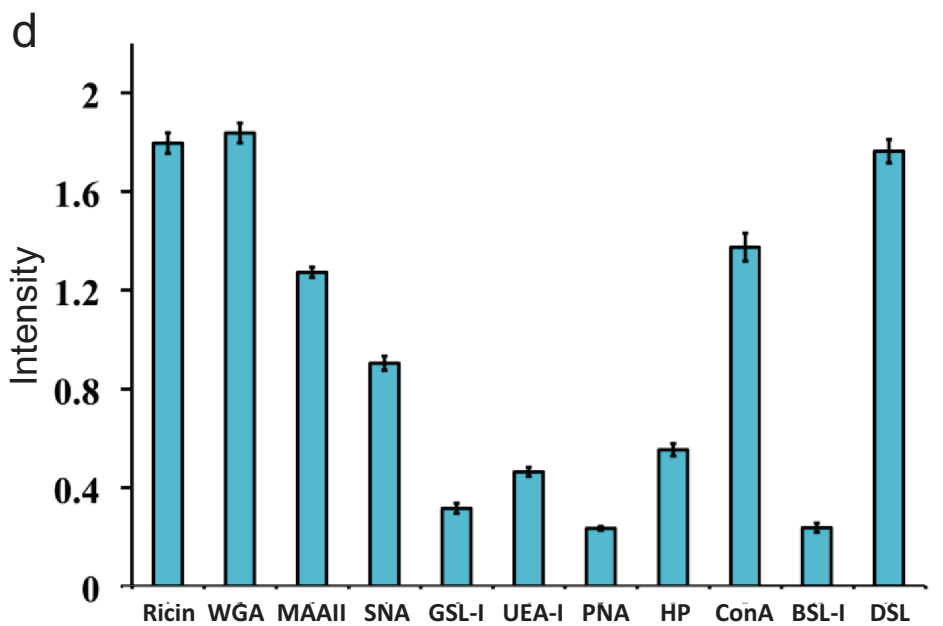

Supplementary Figure 1

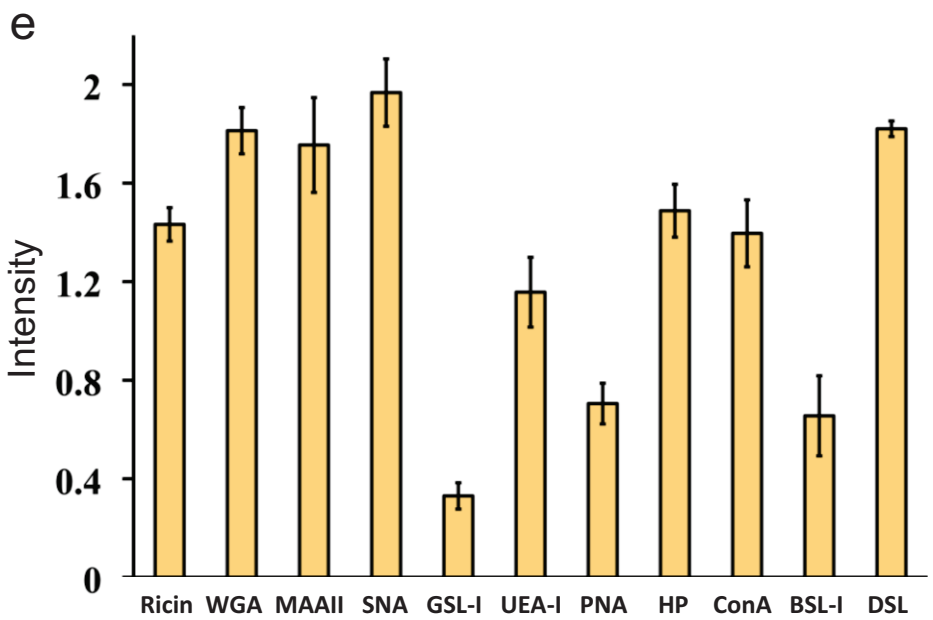

- 1: Ricin → Galβ
- 2: WGA → GlcNAc and Neu5Ac
- 3: MAA-II → Neu5Ac-α2-3
- 4: SNA → Neu5Ac-α2-6
- 5: GSL-I → α-GalNAc and α-Gal
- 6: UEA-I → α-Fucose
- 7: PNA → Galβ1-3GalNAc
- 8: HP → GalNAc
- 9: ConA → Mannose core
- 10: BSL-I → α-GalNAc and α-Gal
- 11: DSL → GlcNAc

a

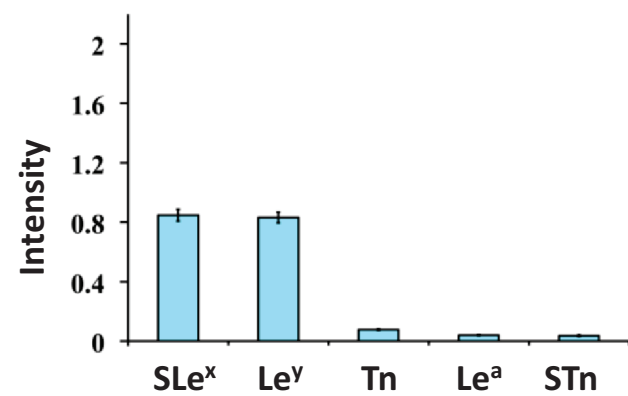

b

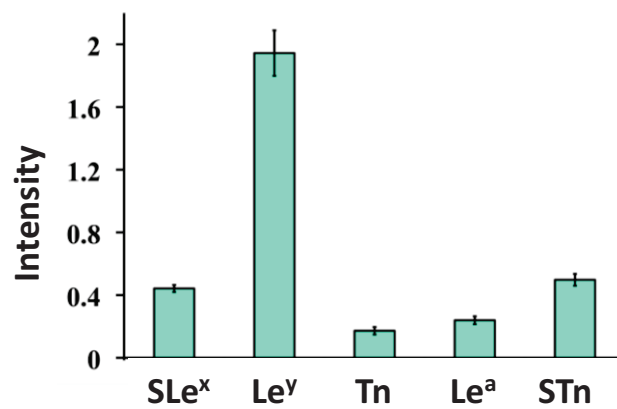

c

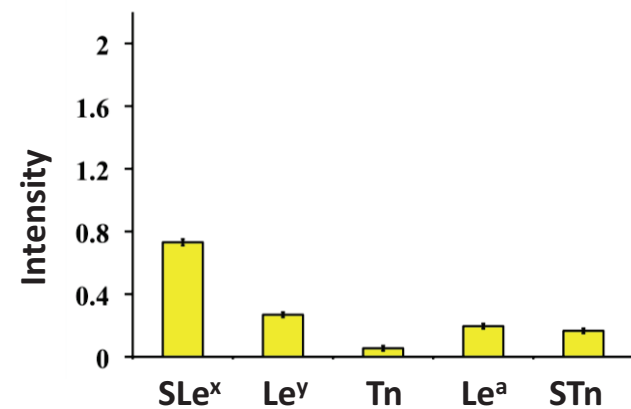

d

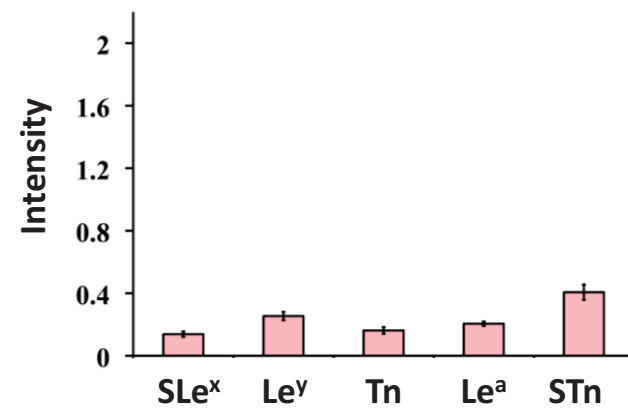

e

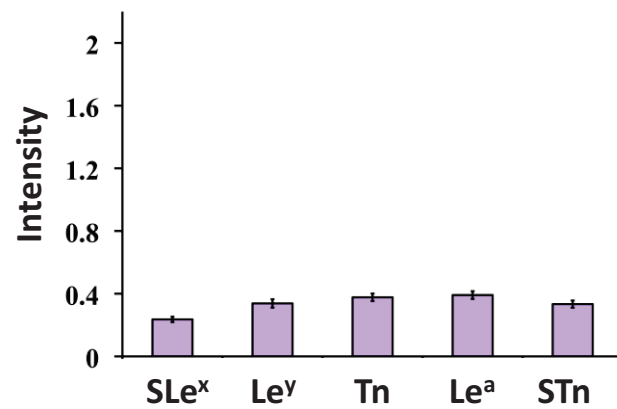

### Supplementary Figure 3

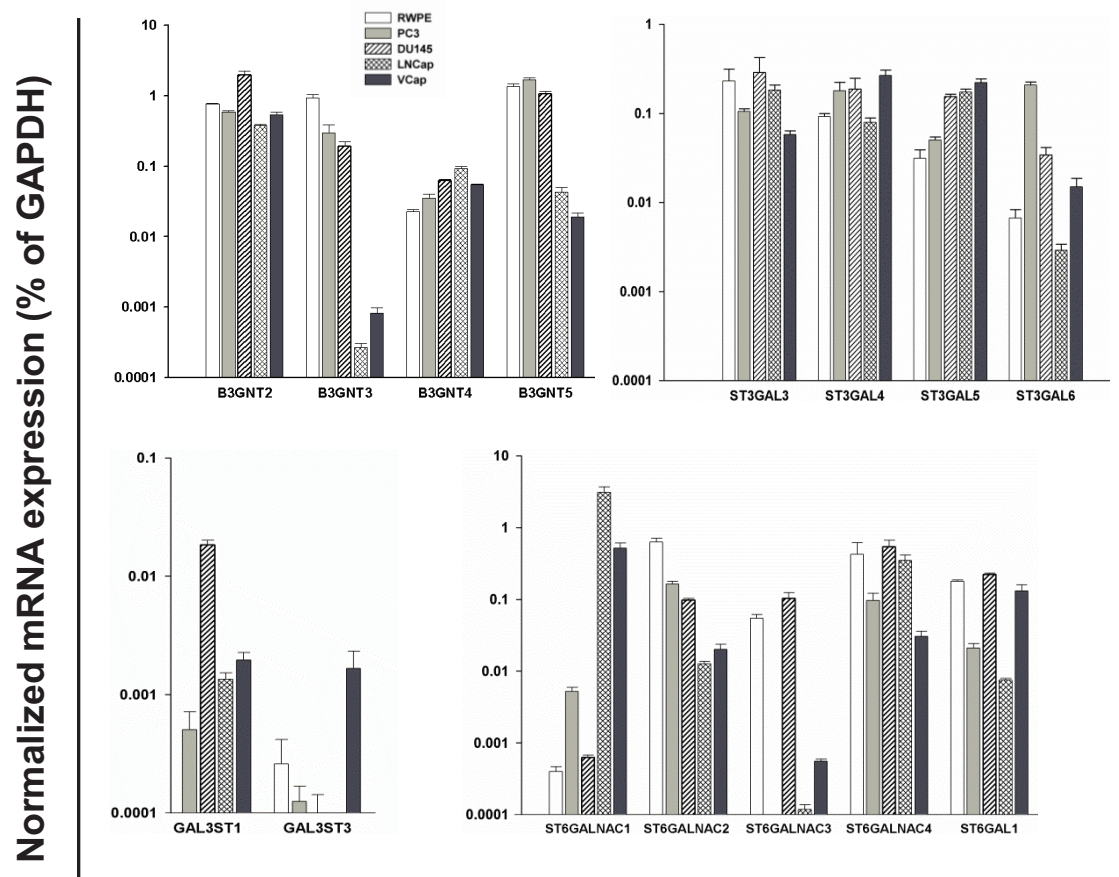

**Supplementary Table 1** Oligonucleotide primers used for quantitative real-time PCR analysis

| Glycosyltransferases*                                 | Forward primer (5'-3')     | Reverse primer (5'-3')      |
|-------------------------------------------------------|----------------------------|-----------------------------|
| <i>MGAT1 (GnT-I)</i>                                  | ATTGTCACCTTCCAGTTCCG       | GTCCACCTCAGCTCATG           |
| <i>MGAT2 (GnT-II)</i>                                 | CAGTTCCGACCGTGACAG         | AGGATTAGCACCTTCCGTTTG       |
| <i>MGAT5 (GnT-V)</i>                                  | TGTGAGGGAAAGATCAAGTGG      | GCTCTCCAAGGTAAATGAGGAC      |
| <i>C1GALT1</i>                                        | AGAAGCAAAGGTCACCAGTCCCAA   | AGCCAGGATTTAGAGGCCATTTCC    |
| <i>GCNT1 (C2GnT1)</i>                                 | GCATGGTTTCTGCAGAGCACAGTT   | TTCCACAATGCCTTGCTACCTGC     |
| <i>GCNT3 (C2GnT2)</i>                                 | AGAAGCGAGAGCCTTTCACAGACA   | TACACAGCTCGCAGTAGCCTTCA     |
| <i>GCNT4 (C2GnT3)</i>                                 | GTTCCCTGGGCTTTCCTTGTTTGA   | ACTCACCTAAGGCCAAAGGGAACA    |
| <i>B3GNT1 (<math>\beta</math>3GlcNAcT1, iGnT)</i>     | TCCTATATCGCCAGTTCAAACAG    | AGCGACATTTCTTACCCAG         |
| <i>B3GNT6 (C3GnT, Core-3 synthase)</i>                | CAACGTAGTCCGCTTCCTG        | AAGTACTTGCTCCAGTGTC         |
| <i>B4GALNT3</i>                                       | TGGATGTTGAGATGGCAGTCG      | TGGAGGTCACAGAGGAAGAT        |
| <i>B4GALT1</i>                                        | CTAGCAACTTGACCTCGGT        | CATTTGGGTTCTGCTTTGCC        |
| <i>B4GALT2</i>                                        | GCATAACGAACTAACCCTCAG      | GCCCAATGTCCACTGTGATA        |
| <i>B4GALT3</i>                                        | GTAACCTCAGTCACCTGCC        | ATTCCGCTCCACAATCTCTG        |
| <i>B4GALT4</i>                                        | ACTTCGTGGGTGCCATTCAAGAGA   | AAGGAGACACAGAAGGGCAGTTGT    |
| <i>B4GALT5</i>                                        | TGGAACAGAGTACAGAATGCAG     | CCTTGCCGTTCTTTTGACTTC       |
| <i>B4GALT6</i>                                        | CTTCACATACTACCATACTCC      | CCCCTGGCTCAATATCTAAATCC     |
| <i>B3GALT5</i>                                        | ATTGGCATATCTGGTTCTGAGG     | AGGTTCTGGGCTTGGTTTG         |
| <i>ST3GAL1</i>                                        | ATCCCGGTTTCTGCAAAGATCAGA   | ACAAGTCCACCTCATCGCAGACAT    |
| <i>ST3GAL2</i>                                        | TTTGATGTGGTGCCAGAATAGGC    | AGGTGAAGAGCAGGGACATGATGA    |
| <i>FUT1</i>                                           | CCACTCTGGACATTGGCTA        | GCTGGCTCTAGAAAGATCAG        |
| <i>FUT2</i>                                           | GAGTGAAGAGAGACCCAGAGGGAAC  | CTTTGATGTTGAGGCTAGCAGCTGGT  |
| <i>FUT3</i>                                           | AGAGAGATCATCACGGCACGGTTT   | ATAAGTGGTGGTCTGGGCTTGAA     |
| <i>FUT4</i>                                           | TGCAGGTGGGACTTTGTTGTTTGG   | TCCTCCAAGGACAATCCAGCACTT    |
| <i>GAL3ST2</i>                                        | GATTCTGCACTCGGACTTAG       | GAAGCGGTAGAGGATGTTGAG       |
| <i>GAL3ST4</i>                                        | CTACCCAAAGCTCTTCCAGG       | AGAAGCTGTCAGAAGGCATG        |
| <i>CHST1 (GlcNAc6ST1)</i>                             | CGAAATGGAGCAGTTGCCCTGAA    | ACTCCTCCACCTGTTTGATCTGCT    |
| <i>CHST2 (GlcNAc6ST2)</i>                             | ATCCCATGAATTTGCTGGGCTACC   | AGATGTAGGCAAGGCTCAGAAGCA    |
| <i>CHST3 (GlcNAc6ST3)</i>                             | GCAGACACGCCAAGCTTTGAGAAA   | AGCTGCAACGCTGATCACAAATCC    |
| <i>CHST4 (GlcNAc6ST4)</i>                             | TAGTGCAACTTCTGTGAGCCAGT    | TCCATCAAGCCTCACCTCACAACA    |
| <i>GAPDH</i>                                          | GAGAGGAGCAGGTAGAGGG        | AGAATGAGGGTGGCATTGG         |
| <i>B3GNT2</i>                                         | CTGCTCCTATGTAGATCTGATGTTAG | TGGGAAC TATCAA AATACACCTTTC |
| <i>B3GNT3 (elongation <math>\beta</math>3GlcNAcT)</i> | ATAAGGGAGTGCCAGGGAAGGTTT   | ACAGTTGGA ACTTAGCACAGGCA    |
| <i>B3GNT4</i>                                         | CCCAACGTGTTAGAGTTCTCTG     | TGAGGGTGGGATGAAGTATTT       |
| <i>B3GNT5</i>                                         | TGACTTCAGCAAGAGTGACTG      | TTGTTTTGCGTGTTTCCGAC        |
| <i>ST3GAL3</i>                                        | TGTTCTGGATGACTCCTTTTCGCA   | CTTGTTGGCAAGAACGCCTCCATT    |
| <i>ST3GAL4</i>                                        | ATGAGCAGATCACGCTCAAGTCCA   | TCCCATCTCCAGCATCCGCTTAAT    |
| <i>ST3GAL5</i>                                        | GCACGGATTAGA ACTGGG        | CGCCCTCTGGATAAGTCAT         |
| <i>ST3GAL6</i>                                        | TCTATTGGGTGGCACCTGTGGAAA   | TGATGAAACCTCAGCAGAGAGGCA    |
| <i>GAL3ST1</i>                                        | CCTCAGCCTTCCAAGTAACTAG     | AGGAAACTAGTGAAGAGCGC        |
| <i>GAL3ST3</i>                                        | CACCGTAAGCCTTCTCATCC       | CTGCCGTCTTGAGTCTTC          |
| <i>B3GALT1</i>                                        | GACCATGCTTGATTTCTGAAC      | CCTCTGCCTCATTCTACTTTC       |
| <i>B3GALT2</i>                                        | AGTGGGCATAATCCTCTTAC       | GCAATCATTTTCTAATTCAGTCACATT |
| <i>ST6GALNAC1</i>                                     | TTCAAATCTGAGCCTCGGTG       | AGTGAGGTTGGGCAGAAAG         |
| <i>ST6GALNAC2</i>                                     | AACTCCCTCGTCTCCTACTG       | CCGATCTCAGCATCACATAGTC      |
| <i>ST6GALNAC3</i>                                     | CATTCTCTACACATACAGGCG      | CTATCTCATTTCCACCTTCTGG      |
| <i>ST6GALNAC4</i>                                     | TTCACCATGATCCTCGCG         | CATCTGACACTCATCTAGCCG       |
| <i>ST6GAL1</i>                                        | TGGTGAATGTCATGGAGCC        | AGGGAAGGTTTATTGGGTCTG       |

\* Gene name in parenthesis are used to denote enzyme species throughout this manuscript.
